# Supplementary material for: Graphene wrapped 3,4,9,10-perylenetetracarboxylic dianhydride as a high-performance organic cathode for lithium ion batteries
Source: Royal Society of Chemistry journal article supplement (doi:10.1039/c6ta02880b), 2016-01-01
Supplement: c6ta02880b1.pdf [file c6ta02880b1.pdf]

Supporting Information

**Graphene wrapped 3,4,9,10-perylenetetracarboxylic dianhydride as high-performance organic cathode for lithium ion batteries**

*Dongming Cui, Di Tian, Shasha Chen, Liangjie Yuan\**

[\*] Prof. L. Yuan, Dr. D. Cui, Dr. D. Tian, S. Chen

College of Chemistry and Molecular Sciences, Wuhan University, Wuhan 430072, P.  
R. China.

E-mail: [ljyuan@whu.edu.cn](mailto:ljyuan@whu.edu.cn)

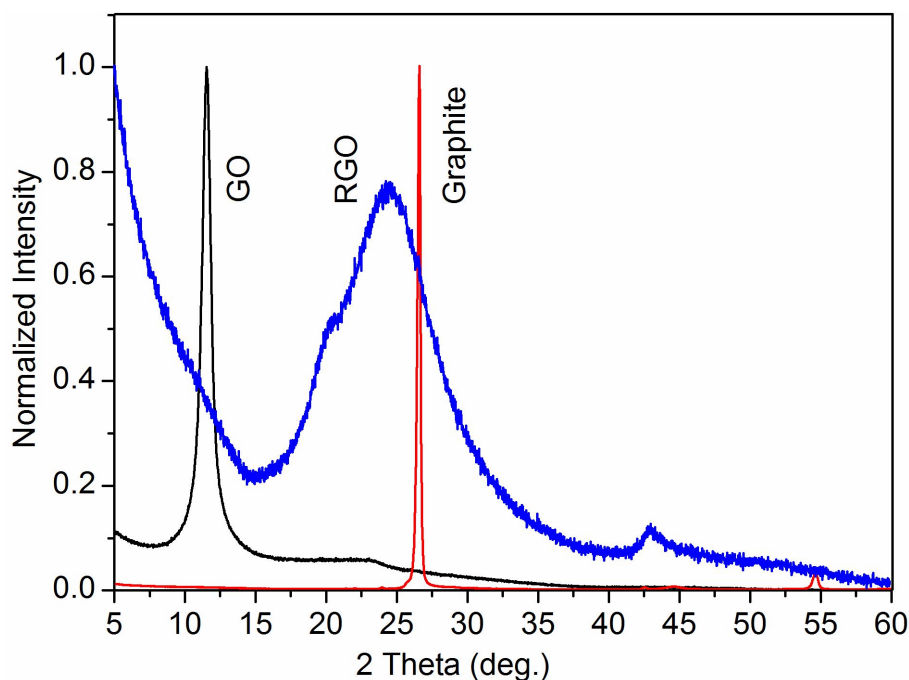

**Fig. S1** XRD patterns of natural flake graphite, pre-formed GO and the rGO that prepared by thermal reduction at 400 °C.

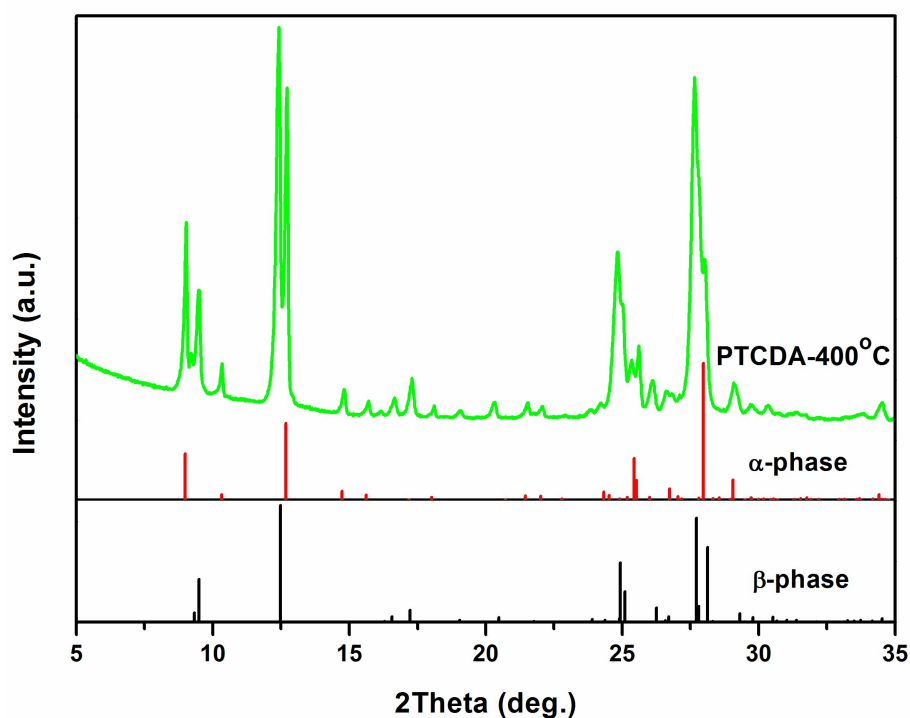

**Fig. S2** XRD patterns of 400 °C treated bare PTCDA. The XRD patterns clearly demonstrate the existence of a portion of  $\alpha$  phase PTCDA, which also displayed a monoclinic  $P2_1/c$  space group. It's evident that the phase transformation occurred at 400 °C and thus give a different XRD patterns for 400 °C treated PTCDA/rGO composite. However, the 400 °C treated bare PTCDA showed no obvious improvement in electrochemical performance compared to pristine PTCDA.

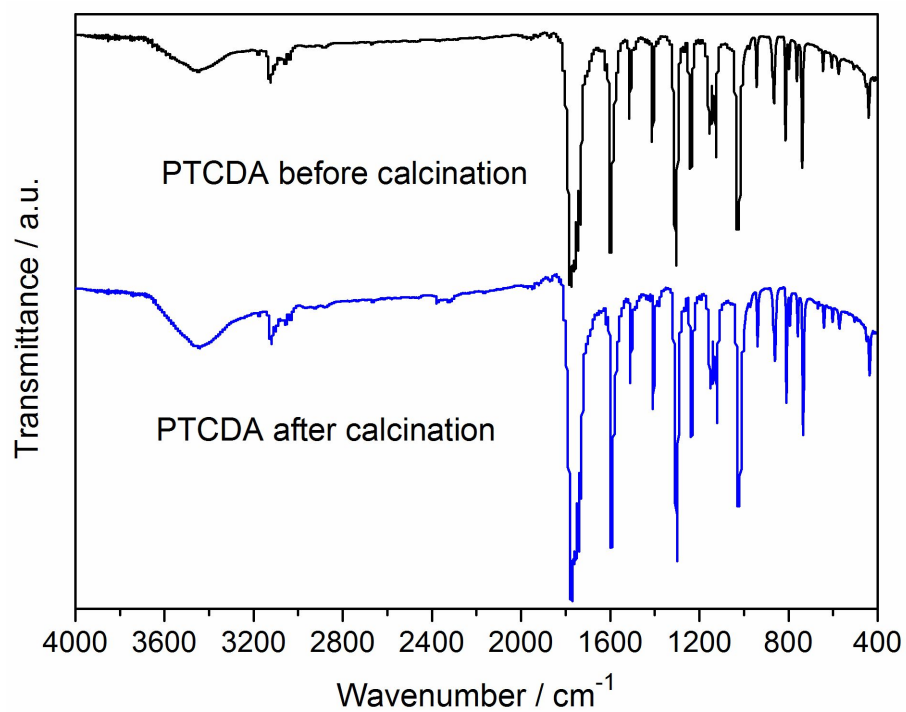

**Fig. S3** IR spectra of pristine PTCDA before and after calcination at 400 °C. The spectra for 400 °C treated PTCDA show high consistency with pristine PTCDA, indicating the unchanged chemical structure of PTCDA in the PTCDA/rGO composites.

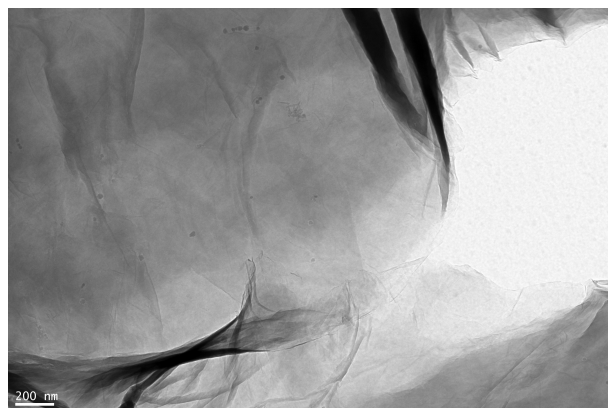

**Fig. S4** TEM image of the pre-formed GO nanosheets. It clearly present a sheet-like morphology with multilayer GO nanosheets corrugated together.

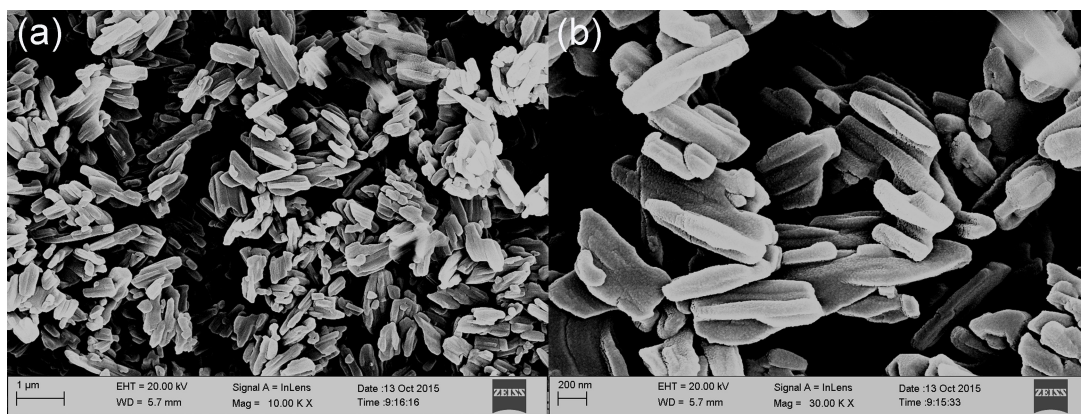

**Fig. S5** SEM images of the pristine PTCDA particles. The rod-like pristine PTCDA particles are about 1  $\mu\text{m}$  in length and 200 nm in diameter, and adjacent PTCDA particles are loosely stacked together.

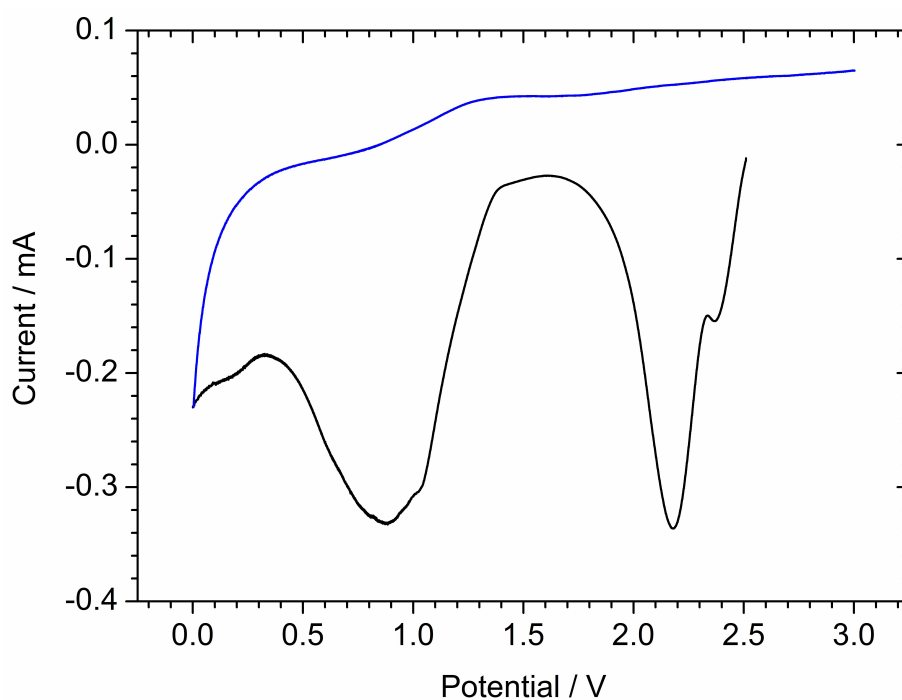

**Fig. S6** CV curves of PTCDA electrode in the potential range of 0.01-3 V at a scan rate of  $0.1 \text{ mV S}^{-1}$ . The black and blue curves are CV profiles of the initial half cycle of discharge and the subsequent charge half cycle, respectively. Obvious cathodic peaks can be observed in the initial half cycle, which are corresponding to lithium enolization reaction at the carbonyl oxygens and the electrochemical reaction of lithium insertion on the unsaturated carbons of  $\text{C}_6$  rings. In addition, only few weak anodic peaks can be observed in the following charge half cycle, confirming the irreversibility of the electrochemical behavior in this low potential range.

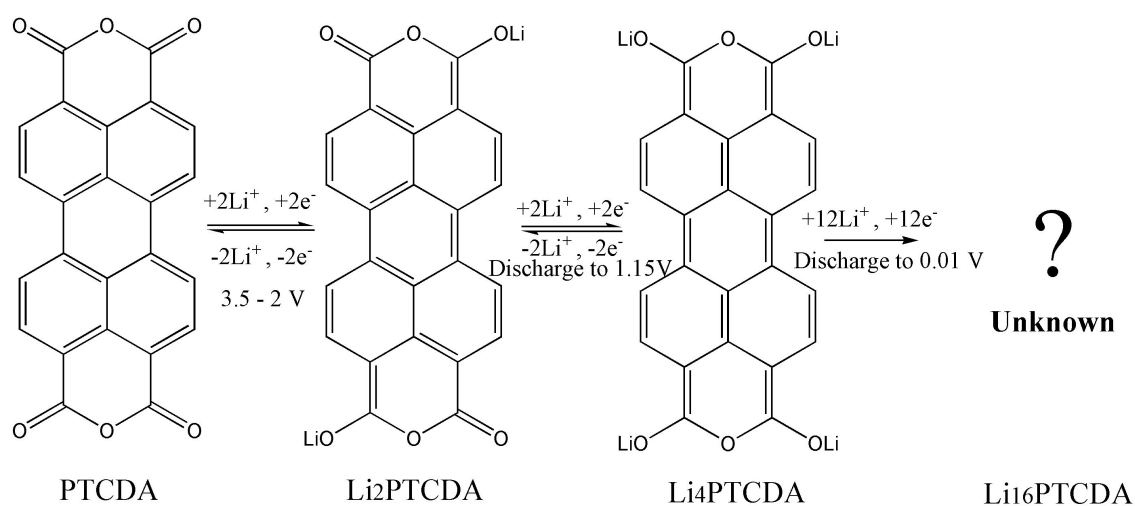

**Fig. S7** Schematic illustration for the proposed electrochemical reactions during Li-ion insertion/deinsertion in PTCDA. And the PTCDA electrode exhibit a multi-step Li insertion process when deep discharged to 0.01 V. About 12 Li ions are gradually incorporated by the unsaturated carbons of C<sub>6</sub> aromatic rings in the potential range of 1.15-0.01 V, resulting in the formation of Li<sub>16</sub>PTCDA, but the exactly molecular structure is unknown.

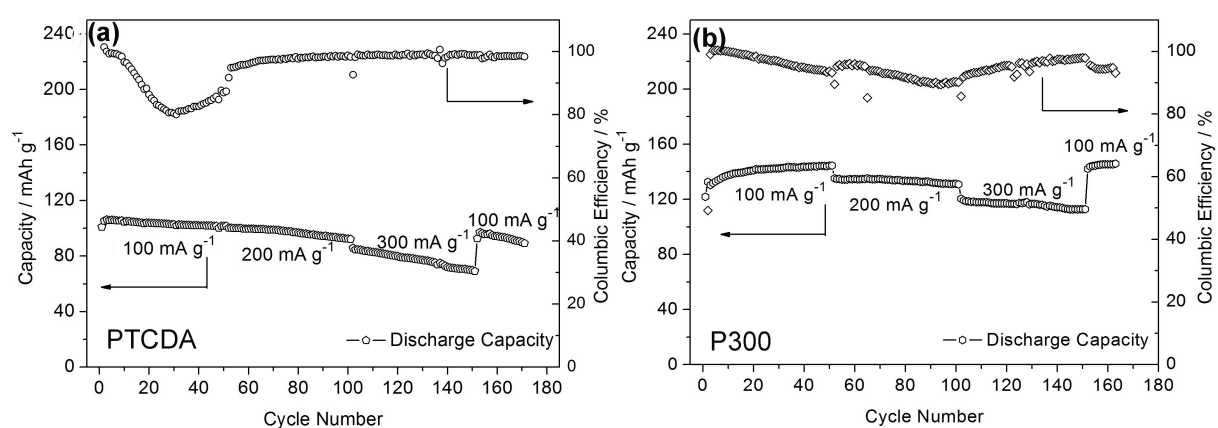

**Fig. S8** Rate capabilities of (a) pristine PTCDA and (b) P300. The rate performance of bare PTCDA was significantly improved by rGO wrapping.

**Table S1** Comparison of the electrochemical performances of rGO wrapped PTCDA with other organic cathodes that are relevant to PTCDA.

| Electrode material  | Theoretical capacity<br>[mAh g <sup>-1</sup> ] | Current rate<br>[mA g <sup>-1</sup> ] | Discharge potential<br>[V vs Li/Li <sup>+</sup> ] | Capacity 1 <sup>st</sup> cycle<br>[mAh g <sup>-1</sup> ] | Capacity retention [%]<br>(cycle number) | Capacity [mAh g <sup>-1</sup> ]<br>(cycling rate) | Ref. |
|---------------------|------------------------------------------------|---------------------------------------|---------------------------------------------------|----------------------------------------------------------|------------------------------------------|---------------------------------------------------|------|
| PTCDA/rGO           | 273                                            | 100                                   | 2.5, 2.35                                         | 138                                                      | 123% (200)                               | 130 (1.83C),<br>100 (3.66C)                       |      |
| Sulfide PTCDA       | 273                                            | 100                                   | 2.4                                               | 131                                                      | 113% (250)                               | N/A                                               | 7    |
| UP                  | 116                                            | 50                                    | 2.43                                              | 80                                                       | 162% (50)                                | 90 (1.7C)                                         | 9    |
| EDP                 | 106                                            | 50                                    | sloping curve                                     | 85                                                       | 88.2% (50)                               | 20 (0.95C)                                        | 9    |
| HP                  | 197                                            | 50                                    | 2.7, 2.3                                          | 130                                                      | 84.6% (50)                               | 100 (1C)                                          | 9    |
| Reduced benzoic-PDI | 85                                             | 425                                   | sloping curve                                     | 90                                                       | 88% (200)                                | 100 (20C), 68<br>(30C)                            | 10   |
| PTCDA/CNT           | 273                                            | 100                                   | 2.4                                               | 122                                                      | 74% (300)                                | 120 (1C), 115<br>(2C)                             | 11   |
| PI/CNT              | N/A                                            | 100                                   | sloping curve                                     | 115                                                      | 93% (300)                                | N/A                                               | 11   |
